# Supplementary material for: A novel organic–inorganic hybrid polyoxometalate for the selective adsorption/isolation of β-lactoglobulin
Source: Royal Society of Chemistry journal article supplement (doi:10.1039/c5tb01298h), 2015-01-01
Supplement: c5tb01298h1.pdf [file c5tb01298h1.pdf]

## **Electronic Supplementary Information**

### **A novel organic-inorganic hybrid polyoxometalate for the selective adsorption/isolation of $\beta$ -lactoglobulin**

Qing Chen, Dan-Dan Zhang, Meng-Meng Wang, Xu-Wei Chen\*, Jian-Hua Wang\*

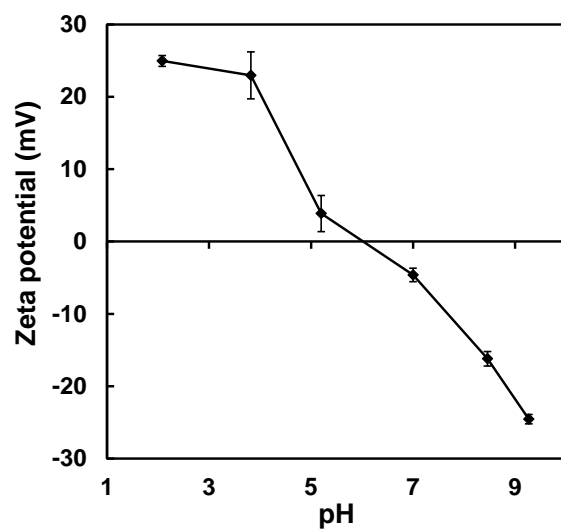

Figure S1. The zeta potential of TPPA-PMO<sub>12</sub> hybrid with different pH value.

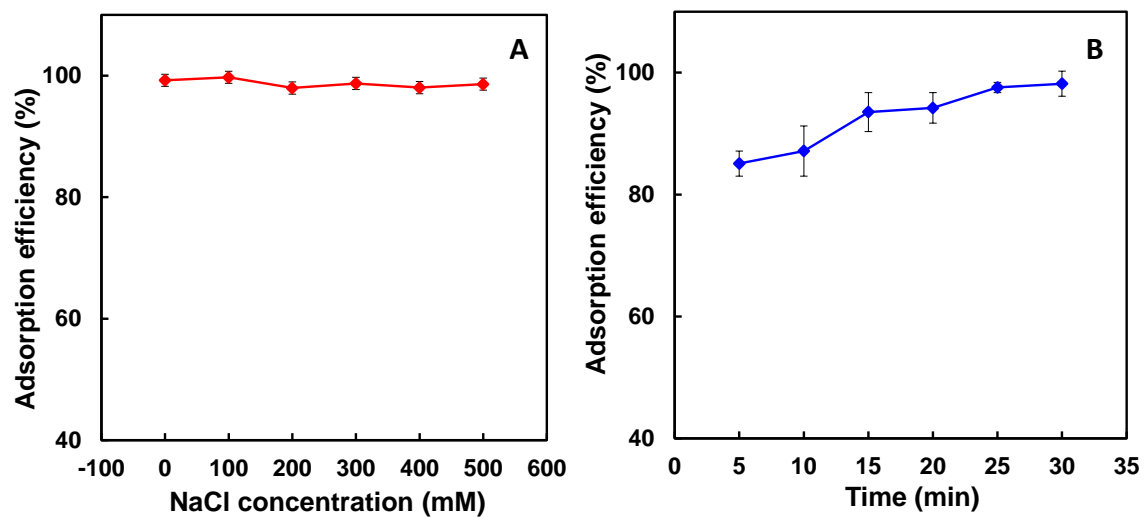

Figure S2. Effect of ionic strength (A) and adsorption time (B) on the adsorption efficiency of  $\beta$ -Lg. Protein solution: 100 mg L<sup>-1</sup>, 1.0 mL, pH 5.0; TPPA-PMO<sub>12</sub> hybrid: 0.5 mg.

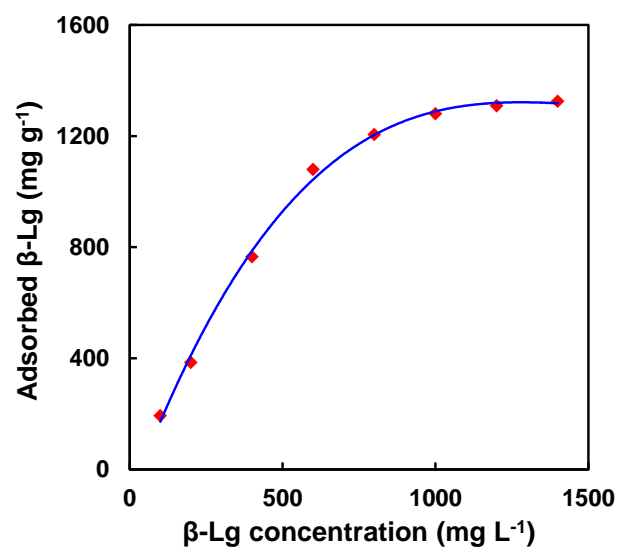

**Figure S3.** The adsorption isotherm of  $\beta$ -Lg by the TPPA-PMo<sub>12</sub> hybrid. Protein solution: 100-1400 mg L<sup>-1</sup>, 1.0 mL; pH: 5.0; TPPA-PMo<sub>12</sub> hybrid: 0.5 mg; adsorption time: 30 min.

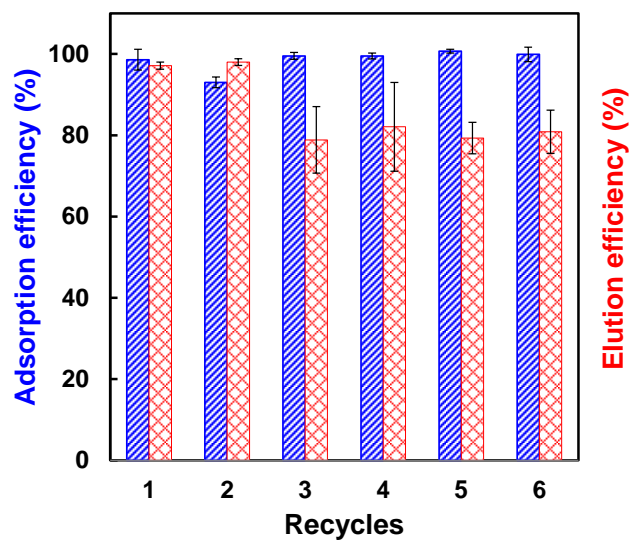

Figure S4. The reusability of the TPPA-PMO<sub>12</sub> hybrid for the adsorption/desorption performance for  $\beta$ -Lg by six continuous operation runs of adsorption/desorption.  $\beta$ -Lg solution: 100 mg L<sup>-1</sup>, 1.0 mL, pH 5.0; TPPA-PMO<sub>12</sub>: 0.5 mg; adsorption time: 30 min; stripping reagent: Tris-HCl (50 mmol L<sup>-1</sup>, pH 8.0); stripping time: 10 min.
